# Supplementary material for: The effect of µ-CN linkage isomerism and ancillary ligand set on directional metal–metal charge-transfer in cyanide-bridged dimanganese complexes
Source: Royal Society of Chemistry journal article supplement (doi:10.1039/b705975b), 2007-01-01
Supplement: b705975b.pdf [file b705975b.pdf]

**Supplementary Tables.** Metal-to-metal charge-transfer data.

*trans*-[(dppm)(CO)<sub>2</sub>{(PhO)<sub>3</sub>P}Mn(μ-NC)Mn{P(OPh)<sub>3</sub>}(NO)(η<sup>5</sup>-C<sub>5</sub>H<sub>4</sub>Me)]<sup>2+</sup> *trans*-**2**<sup>2+</sup>.

| Solvent                         | DN <sup>a</sup> | $\lambda_{\max}$ / nm | $E$ / cm <sup>-1</sup> | $\epsilon$ / dm <sup>3</sup> mol <sup>-1</sup><br>cm <sup>-1</sup> | $\nu_{1/2}$ / cm <sup>-1</sup> | $J$ / cm <sup>-1</sup> | $\alpha^2$ / % |
|---------------------------------|-----------------|-----------------------|------------------------|--------------------------------------------------------------------|--------------------------------|------------------------|----------------|
| CH <sub>2</sub> Cl <sub>2</sub> | 1.0             | 852                   | 11737                  | 2930                                                               | 3530                           | 1403                   | 1.43           |
| MeCN                            | 14.1            | 848                   | 11792                  | 2550                                                               | 3501                           | 1302                   | 1.22           |
| acetone                         | 17.0            | 855                   | 11692                  | 2834                                                               | 3650                           | 1395                   | 1.42           |
| thf                             | 20.0            | 870                   | 11494                  | 2725                                                               | 3642                           | 1355                   | 1.39           |

*trans*-[(dppm)(CO)<sub>2</sub>{(PhO)<sub>3</sub>P}Mn(μ-NC)Mn(CN*i*Bu<sup>t</sup>)(NO)(η<sup>5</sup>-C<sub>5</sub>H<sub>4</sub>Me)]<sup>2+</sup> *trans*-**3**<sup>2+</sup>.

| Solvent                         | DN <sup>a</sup> | $\lambda_{\max}$ / nm | $E$ / cm <sup>-1</sup> | $\epsilon$ / dm <sup>3</sup> mol <sup>-1</sup><br>cm <sup>-1</sup> | $\nu_{1/2}$ / cm <sup>-1</sup> | $J$ / cm <sup>-1</sup> | $\alpha^2$ / % |
|---------------------------------|-----------------|-----------------------|------------------------|--------------------------------------------------------------------|--------------------------------|------------------------|----------------|
| CH <sub>2</sub> Cl <sub>2</sub> | 1.0             | 972                   | 10288                  | 2633                                                               | 2487                           | 1041                   | 1.02           |
| CHCl <sub>3</sub>               | 4.0             | 968                   | 10330                  | 5381                                                               | 2427                           | 2194                   | 0.45           |
| MeCN                            | 14.1            | 976                   | 10246                  | 2839                                                               | 2118                           | 996                    | 0.94           |
| acetone                         | 17.0            | 972                   | 10288                  | 2158                                                               | 2222                           | 891                    | 0.75           |
| thf                             | 20.0            | 982                   | 10183                  | 2193                                                               | 2252                           | 900                    | 0.78           |

*trans*-[(dppm)(CO)<sub>2</sub>{(PhO)<sub>3</sub>P}Mn(μ-NC)Mn(CNXyl)(NO)(η<sup>5</sup>-C<sub>5</sub>H<sub>4</sub>Me)]<sup>2+</sup> *trans*-**4**<sup>2+</sup>.

| Solvent                         | DN <sup>a</sup> | $\lambda_{\max}$ / nm | $E$ / cm <sup>-1</sup> | $\epsilon$ / dm <sup>3</sup> mol <sup>-1</sup><br>cm <sup>-1</sup> | $\nu_{1/2}$ / cm <sup>-1</sup> | $J$ / cm <sup>-1</sup> | $\alpha^2$ / % |
|---------------------------------|-----------------|-----------------------|------------------------|--------------------------------------------------------------------|--------------------------------|------------------------|----------------|
| CH <sub>2</sub> Cl <sub>2</sub> | 1.0             | 948                   | 10548                  | 2096                                                               | 2924                           | 1020                   | 0.94           |
| CHCl <sub>3</sub>               | 4.0             | 944                   | 10593                  | 2400                                                               | 3030                           | 1113                   | 1.10           |
| MeCN                            | 14.1            | 968                   | 10330                  | 2134                                                               | 2577                           | 956                    | 0.86           |
| acetone                         | 17.0            | 942                   | 10615                  | 1260                                                               | 2381                           | 715                    | 0.45           |
| thf                             | 20.0            | 956                   | 10460                  | 1462                                                               | 2674                           | 811                    | 0.60           |
| dmf                             | 29.8            | 967                   | 10341                  | 1435                                                               | 2688                           | 801                    | 0.60           |

*trans*-[(dppm)(CO)<sub>2</sub>{(EtO)<sub>3</sub>P}Mn(μ-NC)Mn{P(OPh)<sub>3</sub>}(NO)(η<sup>5</sup>-C<sub>5</sub>H<sub>4</sub>Me)]<sup>2+</sup> *trans*-**6**<sup>2+</sup>.

| Solvent                         | DN <sup>a</sup> | $\lambda_{\max}$ / nm | $E / \text{cm}^{-1}$ | $\epsilon / \text{dm}^3 \text{mol}^{-1} \text{cm}^{-1}$ | $\nu_{1/2} / \text{cm}^{-1}$ | $J / \text{cm}^{-1}$ | $\alpha^2 / \%$ |
|---------------------------------|-----------------|-----------------------|----------------------|---------------------------------------------------------|------------------------------|----------------------|-----------------|
| CH <sub>2</sub> Cl <sub>2</sub> | 1.0             | 811                   | 12329                | 2909                                                    | 3968                         | 1513                 | 1.50            |
| CHCl <sub>3</sub>               | 4.0             | 788                   | 12690                | 1809                                                    | 3205                         | 1088                 | 0.74            |
| MeCN                            | 14.1            | 798                   | 12531                | 1337                                                    | 3906                         | 1026                 | 0.67            |
| acetone                         | 17.0            | 798                   | 12531                | 1752                                                    | 4032                         | 1193                 | 0.91            |
| thf                             | 20.0            | 789                   | 12674                | 2771                                                    | 3937                         | 1491                 | 1.39            |

*trans*-[(dppm)(CO)<sub>2</sub>{(EtO)<sub>3</sub>P}Mn(μ-NC)Mn(CN*i*Bu)(NO)(η<sup>5</sup>-C<sub>5</sub>H<sub>4</sub>Me)]<sup>2+</sup> *trans*-**7**<sup>2+</sup>.

| Solvent                         | DN <sup>a</sup> | $\lambda_{\max}$ / nm | $E / \text{cm}^{-1}$ | $\epsilon / \text{dm}^3 \text{mol}^{-1} \text{cm}^{-1}$ | $\nu_{1/2} / \text{cm}^{-1}$ | $J / \text{cm}^{-1}$ | $\alpha^2 / \%$ |
|---------------------------------|-----------------|-----------------------|----------------------|---------------------------------------------------------|------------------------------|----------------------|-----------------|
| CH <sub>2</sub> Cl <sub>2</sub> | 1.0             | 877                   | 11402                | 2685                                                    | 3425                         | 1300                 | 1.30            |
| CHCl <sub>3</sub>               | 4.0             | 860                   | 11627                | 2137                                                    | 3636                         | 1206                 | 1.08            |
| MeCN                            | 14.1            | 875                   | 11428                | 3024                                                    | 3425                         | 1380                 | 1.46            |
| acetone                         | 17.0            | 872                   | 11467                | 3565                                                    | 3436                         | 1504                 | 1.72            |
| thf                             | 20.0            | 868                   | 11520                | 2748                                                    | 3378                         | 1312                 | 1.30            |
| dmf                             | 29.8            | 870                   | 11494                | 2408                                                    | 3367                         | 1225                 | 1.14            |

*trans*-[(dppm)(CO)<sub>2</sub>{(EtO)<sub>3</sub>P}Mn(μ-NC)Mn(CN*Xyl*)(NO)(η<sup>5</sup>-C<sub>5</sub>H<sub>4</sub>Me)]<sup>2+</sup> *trans*-**8**<sup>2+</sup>.

| Solvent                         | DN <sup>a</sup> | $\lambda_{\max}$ / nm | $E / \text{cm}^{-1}$ | $\epsilon / \text{dm}^3 \text{mol}^{-1} \text{cm}^{-1}$ | $\nu_{1/2} / \text{cm}^{-1}$ | $J / \text{cm}^{-1}$ | $\alpha^2 / \%$ |
|---------------------------------|-----------------|-----------------------|----------------------|---------------------------------------------------------|------------------------------|----------------------|-----------------|
| CH <sub>2</sub> Cl <sub>2</sub> | 1.0             | 856                   | 11682                | 1409                                                    | 3533                         | 967                  | 0.69            |
| MeCN                            | 14.1            | 861                   | 11614                | 1312                                                    | 3533                         | 931                  | 0.64            |
| acetone                         | 17.0            | 850                   | 11765                | 892                                                     | 3649                         | 785                  | 0.44            |
| thf                             | 20.0            | 841                   | 11890                | 1342                                                    | 3636                         | 966                  | 0.66            |

*trans*-[(dppm)(CO)<sub>2</sub>{(EtO)<sub>3</sub>P}Mn(μ-NC)Mn(CN*l*Bu)(NO)(η<sup>5</sup>-C<sub>5</sub>Me<sub>5</sub>)]<sup>2+</sup> *trans*-**10**<sup>2+</sup>.

| Solvent                         | DN <sup>a</sup> | $\lambda_{\max}$ / nm | $E$ / cm <sup>-1</sup> | $\epsilon$ / dm <sup>3</sup> mol <sup>-1</sup><br>cm <sup>-1</sup> | $\nu_{1/2}$ / cm <sup>-1</sup> | $J$ / cm <sup>-1</sup> | $\alpha^2$ / % |
|---------------------------------|-----------------|-----------------------|------------------------|--------------------------------------------------------------------|--------------------------------|------------------------|----------------|
| CH <sub>2</sub> Cl <sub>2</sub> | 1.0             | 1021                  | 9794                   | 3460                                                               | 2183                           | 1140                   | 1.36           |
| CHCl <sub>3</sub>               | 4.0             | 966                   | 10351                  | 3365                                                               | 2222                           | 1116                   | 1.16           |
| MeCN                            | 14.1            | 1024                  | 9765                   | 3926                                                               | 2164                           | 1155                   | 1.40           |
| acetone                         | 17.0            | 1002                  | 9980                   | 3624                                                               | 2058                           | 1094                   | 1.28           |
| thf                             | 20.0            | 986                   | 10141                  | 3450                                                               | 2174                           | 1106                   | 1.19           |
| dmf                             | 29.8            | 1002                  | 9980                   | 3345                                                               | 2083                           | 1057                   | 1.12           |

<sup>a</sup> DN = Gutmann Donor Number.
